# Supplementary material for: Association between Rumen Microbiota and Marbling Score in Korean Native Beef Cattle
Source: PubMed Central journal article supplement (PMC7222830; doi:10.3390/ani10040712), 2020-04-19
Supplement: animals-10-00712-s001.pdf [file animals-10-00712-s001.pdf]

Article

# Association between Rumen Microbiota and Marbling Score in Korean Native Beef Cattle

Minseok Kim <sup>1,2,†</sup>, Tansol Park <sup>3,†</sup>, Jin Young Jeong <sup>1</sup>, Youlchang Baek <sup>1</sup> and Hyun-Jeong Lee <sup>4,\*</sup>

<sup>1</sup> Animal Nutrition & Physiology Team, National Institute of Animal Science, Wanju 55365, Republic of Korea; mkim2276@gmail.com (M.K.); jeong73@korea.kr (J.Y.J); chang4747@korea.kr (Y.B.)

<sup>2</sup> Department of Animal Science, College of Agriculture and Life Sciences, Chonnam National University, Gwangju 61186, Republic of Korea; mkim2276@gmail.com

<sup>3</sup> Department of Animal Sciences, The Ohio State University, Columbus, OH 43210, USA; tansol1719@gmail.com

<sup>4</sup> Dairy Science Division, National Institute of Animal Science, Cheonan 31000, Republic of Korea; hyunj68@korea.kr

\* Correspondence: hyunj68@korea.kr

† These authors contributed equally to this work.

## Supplementary materials

**Table S1.** Feed and nutrient composition of diets during the early weaning period, growing and fattening stages.

| Early weaning diet |                             |                         | Growing stage                  | Early fattening stage | Late fattening stage |       |
|--------------------|-----------------------------|-------------------------|--------------------------------|-----------------------|----------------------|-------|
| Item               | Concentrate, % <sup>1</sup> | Starch 30% <sup>2</sup> | %                              | %                     | %                    |       |
| Corn               | 13.00                       | 30.40                   | Gluten feed                    | 4.83                  | 12.46                | 13.49 |
| Wheat              | 10.00                       | 10.00                   | Molasses cane                  | 4.48                  | 3.74                 | 5.06  |
| Beet pulp pellet   | 5.00                        | 5.00                    | Wheat bran                     | 42.44                 | 24.92                | 16.86 |
| Coconut oil meal   | 2.50                        | -                       | Coconut kernel meal            | 3.12                  | 7.48                 | 6.74  |
| Gluten feed        | 6.00                        | 3.00                    | Corn gluten meal               | 0                     | 2.49                 | 4.27  |
| Rice hull          | 1.00                        | 1.00                    | Corn flakes                    | 31.25                 | 39.00                | 45.52 |
| Wheat bran         | 32.00                       | 14.00                   | Palm meal                      | 10.70                 | 7.48                 | 5.62  |
| Wheat fl off       | 5.00                        | 5.00                    | Vitamin premix                 | 0.45                  | 0.12                 | 0.11  |
| Almond shell       | 3.00                        | 2.89                    | Limestone                      | 2.33                  | 1.37                 | 1.32  |
| Soy hull           | -                           | 3.74                    | Salt                           | 0.40                  | 0.44                 | 0.51  |
| Rapeseed meal      | 2.00                        | 2.00                    | Sodium bicarbonate             | 0                     | 0.50                 | 0.50  |
| Soybean meal       | 7.09                        | 11.30                   | Oat grass                      | 33.95                 | 3.02                 | 0     |
| DDGS <sup>3</sup>  | 3.00                        | 3.00                    | Rice straw                     | 0                     | 16.72                | 11.03 |
| Limestone          | 3.00                        | 1.97                    |                                |                       |                      |       |
| Molasses cane      | 3.00                        | 3.00                    | Nutrient composition (% of DM) |                       |                      |       |
| Salt               | 0.60                        | 0.60                    | Crude ash                      | 6.96                  | 5.68                 | 5.52  |
| Mineral premix     | 0.20                        | 0.20                    | Crude protein                  | 15.10                 | 16.55                | 16.20 |
| Vitamin premix     | 0.12                        | 0.12                    | Ca                             | 0.89                  | 0.68                 | 0.42  |
| Others             | 3.49                        | 2.78                    | P                              | 0.59                  | 0.55                 | 0.55  |
|                    |                             |                         | NDF                            | 27.67                 | 23.83                | 21.86 |

| Nutrient composition (% of DM) |       |       | ADF | 10.50 | 9.97  | 7.89  |
|--------------------------------|-------|-------|-----|-------|-------|-------|
| Dry matter                     | 87.88 | 87.49 | TDN | 70.59 | 73.90 | 77.86 |
| Crude protein                  | 15.00 | 15.00 |     |       |       |       |
| Ether extract                  | 2.81  | 2.71  |     |       |       |       |
| Crude fiber                    | 8.54  | 8.03  |     |       |       |       |
| Crude ash                      | 8.83  | 6.84  |     |       |       |       |
| Ca                             | 1.36  | 1.00  |     |       |       |       |
| P                              | 0.56  | 0.44  |     |       |       |       |
| NFE                            | 52.72 | 54.96 |     |       |       |       |
| NFC                            | 32.33 | 37.77 |     |       |       |       |
| ADF                            | 10.58 | 10.00 |     |       |       |       |
| NDF                            | 28.91 | 25.18 |     |       |       |       |
| TDN                            | 67.84 | 72.41 |     |       |       |       |

<sup>1</sup> Concentrate diet fed only to imprinting calves of T1, T2 and T3 dietary treatments from weaning period at 15±4 days of age to 85±4 d of age.

<sup>2</sup> Starch diet fed only to imprinting calves of T3 dietary treatment from weaning at 15±4 days of age to 85±4 d of age.

Control, mother milk + roughage; T1, milk replacement + concentrate; T2, milk replacement + concentrate + roughage (Timothy); T3, milk replacement + concentrate + 30% starch.

<sup>3</sup> Dried distillers grains with solubles.

**Table S2.** Pairwise PERMANOVA results of early weaning diet effect on the rumen microbiota of Hanwoo steers.

| <b>A. Based on the unweighted UniFrac distances</b> |                |                     |                 |                |
|-----------------------------------------------------|----------------|---------------------|-----------------|----------------|
| <b>Group 1</b>                                      | <b>Group 2</b> | <b>Permutations</b> | <b>pseudo-F</b> | <b>Q-value</b> |
| Control                                             | T1             | 999                 | 0.8505          | 0.8120         |
|                                                     | T2             | 999                 | 1.1740          | 0.6405         |
|                                                     | T3             | 999                 | 1.4720          | 0.2040         |
| T1                                                  | T2             | 999                 | 0.8984          | 0.8120         |
|                                                     | T3             | 999                 | 1.0097          | 0.6405         |
| T2                                                  | T3             | 999                 | 1.4419          | 0.2040         |
| <b>B. Based on the weighted UniFrac distances</b>   |                |                     |                 |                |
| <b>Group 1</b>                                      | <b>Group 2</b> | <b>Permutations</b> | <b>pseudo-F</b> | <b>Q-value</b> |
| Control                                             | T1             | 999                 | 1.2209          | 0.5100         |
|                                                     | T2             | 999                 | 1.3970          | 0.5055         |
|                                                     | T3             | 999                 | 2.6229          | 0.2160         |
| T1                                                  | T2             | 999                 | 0.7512          | 0.8940         |
|                                                     | T3             | 999                 | 1.1916          | 0.5055         |
| T2                                                  | T3             | 999                 | 1.3069          | 0.5055         |

**Table S3.** DADA2 denoising statistics of 16S rRNA gene amplicon sequencing variants from the rumen of Korean beef cattle resulting in different marbling score groups.

| Cow ID | Marbling score | Marbling score groups | No. of input paired reads | Quality filtered reads | Denoised reads | Merged reads | Chimera-filtered reads | Taxa-filtered* |
|--------|----------------|-----------------------|---------------------------|------------------------|----------------|--------------|------------------------|----------------|
| 1000   | 3              | LMS                   | 242,981                   | 147,841                | 140,264        | 102,560      | 86,945                 | 86,672         |
| 3145   | 3              | LMS                   | 178,845                   | 115,258                | 110,044        | 84,766       | 78,274                 | 78,006         |
| 3159   | 2              | LMS                   | 220,505                   | 138,029                | 134,313        | 114,078      | 87,803                 | 85,265         |
| 4313   | 3              | LMS                   | 229,278                   | 150,047                | 142,230        | 105,174      | 94,583                 | 94,371         |
| 4326   | 3              | LMS                   | 186,729                   | 119,469                | 113,382        | 87,618       | 80,005                 | 79,490         |
| 1408   | 4              | LMS                   | 237,736                   | 155,974                | 147,654        | 109,958      | 98,265                 | 98,190         |
| 2696   | 4              | LMS                   | 206,219                   | 131,346                | 124,836        | 95,125       | 83,645                 | 83,517         |
| 1336   | 7              | HMS                   | 216,520                   | 138,876                | 132,026        | 98,443       | 86,462                 | 85,804         |
| 2276   | 7              | HMS                   | 216,763                   | 141,260                | 133,857        | 99,943       | 90,111                 | 90,053         |
| 2699   | 7              | HMS                   | 210,759                   | 131,814                | 124,527        | 90,950       | 83,542                 | 83,007         |
| 4316   | 7              | HMS                   | 245,960                   | 159,378                | 151,103        | 115,089      | 100,960                | 100,187        |
| 3157   | 8              | HMS                   | 242,882                   | 150,170                | 141,512        | 101,214      | 91,134                 | 90,438         |
| 4424   | 8              | HMS                   | 227,655                   | 147,679                | 140,381        | 104,621      | 92,366                 | 92,210         |
| 4880   | 8              | HMS                   | 228,848                   | 142,235                | 133,871        | 96,760       | 87,191                 | 87,109         |

\* Amplicon sequencing variants (ASVs) identified as “mitochondria,” “chloroplast,” and “Unassigned” were filtered out.

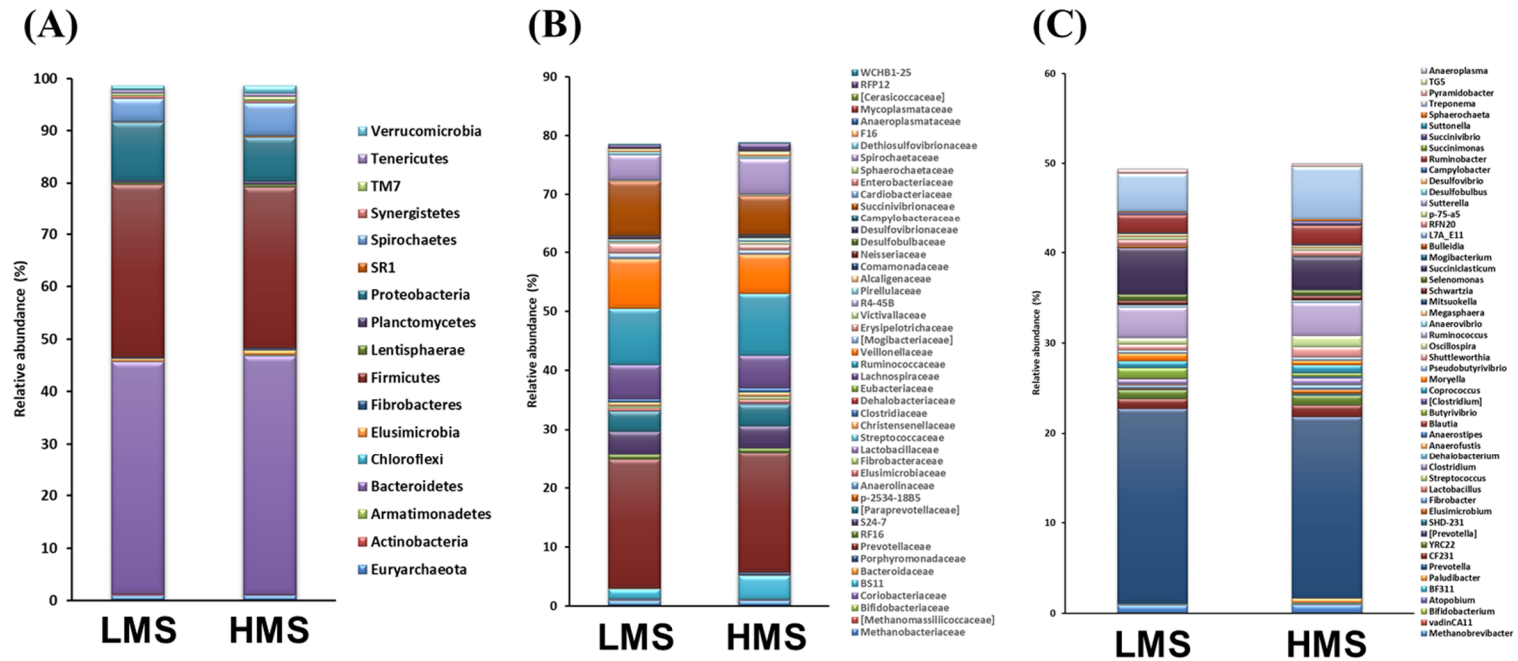

**Figure S1.** Relative abundance barplots of major classified (A) phyla, (B) families, and (C) genera (each taxon found in more than 50% of the 14 rumen samples) of prokaryotes detected in the rumen of Korean beef cattle.

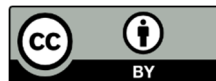

© 2020 by the authors. Submitted for possible open access publication under the terms and conditions of the Creative Commons Attribution (CC BY) license (<http://creativecommons.org/licenses/by/4.0/>).
